# Supplementary material
Source: publisher site journal article supplement (https://www.dovepress.com/article/460265)
Supplement: Supplementary file 1 [file get_supplementary_file.php]

Supplementary table 1 Expression levels (ng/ml) of MOTS-c by ELISA in different groups

| Groups    | 1   | 2   | 3   | M      | SD   |
|-----------|-----|-----|-----|--------|------|
| CONTROL 1 | 200 | 192 | 198 |        |      |
| CONTROL 2 | 199 | 200 | 197 |        |      |
| CONTROL 3 | 192 | 200 | 200 |        |      |
| CONTROL 4 | 189 | 194 | 200 | 195.57 | 3.91 |
| CONTROL 5 | 194 | 199 | 195 |        |      |
| CONTROL 6 | 195 | 196 | 191 |        |      |
| CONTROL 7 | 196 | 187 | 193 |        |      |
| TBI 1     | 159 | 147 | 162 |        |      |
| TBI 2     | 147 | 156 | 151 |        |      |
| TBI 3     | 167 | 161 | 158 |        |      |
| TBI 4     | 152 | 149 | 160 | 154.62 | 7.28 |
| TBI 5     | 142 | 153 | 157 |        |      |
| TBI 6     | 163 | 154 | 155 |        |      |
| TBI 7     | 139 | 151 | 164 |        |      |
| MOTS-c 1  | 175 | 186 | 181 |        |      |
| MOTS-c 2  | 164 | 179 | 185 |        |      |
| MOTS-c 3  | 191 | 174 | 181 |        |      |
| MOTS-c 4  | 158 | 185 | 173 | 176.81 | 9.18 |
| MOTS-c 5  | 166 | 188 | 171 |        |      |
| MOTS-c 6  | 184 | 176 | 163 |        |      |
| MOTS-c 7  | 169 | 187 | 177 |        |      |

Notes: M: mean; SD: standard deviation.

Supplementary table 2 Time crossed the balance beam (s) & Score achieved on the balance beam

| group     | Day 3 |       |      |       |      |       | M<br>(time) | SD<br>(time) | M<br>(score) | SD<br>(score) |
|-----------|-------|-------|------|-------|------|-------|-------------|--------------|--------------|---------------|
|           | 6am   |       | 10am |       | 2pm  |       |             |              |              |               |
|           | Time  | Score | Time | Score | Time | Score |             |              |              |               |
| CONTROL 1 | 22    | 3     | 16   | 4     | 9    | 4     |             |              |              |               |
| CONTROL 2 | 20    | 4     | 14   | 4     | 11   | 4     |             |              |              |               |
| CONTROL 3 | 18    | 4     | 15   | 3     | 12   | 3     |             |              |              |               |
| CONTROL 4 | 25    | 3     | 17   | 3     | 13   | 4     | 15.33       | 4.48         | 3.67         | 0.48          |
| CONTROL 5 | 15    | 3     | 12   | 4     | 10   | 4     |             |              |              |               |
| CONTROL 6 | 23    | 4     | 15   | 4     | 10   | 4     |             |              |              |               |
| CONTROL 7 | 19    | 3     | 14   | 4     | 12   | 4     |             |              |              |               |
| MOTS-c 1  | 35    | 3     | 22   | 3     | 16   | 2     |             |              |              |               |
| MOTS-c 2  | 30    | 3     | 22   | 3     | 15   | 3     |             |              |              |               |
| MOTS-c 3  | 23    | 3     | 18   | 4     | 13   | 3     |             |              |              |               |
| MOTS-c 4  | 27    | 2     | 21   | 3     | 17   | 3     | 20.95       | 6.09         | 2.90         | 0.54          |
| MOTS-c 5  | 30    | 3     | 23   | 3     | 15   | 3     |             |              |              |               |
| MOTS-c 6  | 22    | 2     | 18   | 3     | 11   | 3     |             |              |              |               |

|          |    |   |    |   |    |   |       |      |      |      |
|----------|----|---|----|---|----|---|-------|------|------|------|
| MOTS-c 7 | 25 | 2 | 21 | 3 | 16 | 4 |       |      |      |      |
| TBI 1    | 38 | 2 | 32 | 3 | 26 | 3 |       |      |      |      |
| TBI 2    | 42 | 2 | 34 | 3 | 28 | 2 |       |      |      |      |
| TBI 3    | 43 | 3 | 36 | 2 | 25 | 2 |       |      |      |      |
| TBI 4    | 26 | 2 | 22 | 2 | 18 | 3 | 31.62 | 7.73 | 2.33 | 0.48 |
| TBI 5    | 44 | 2 | 35 | 2 | 27 | 3 |       |      |      |      |
| TBI 6    | 36 | 2 | 30 | 2 | 22 | 2 |       |      |      |      |
| TBI 7    | 42 | 2 | 35 | 2 | 23 | 3 |       |      |      |      |

Notes: M: mean; SD: standard deviation.

Supplementary table 3 Time spent in the target quadrant (s)

| Group     | Day 5 |      |     | M (day 5) | SD (day 5) |
|-----------|-------|------|-----|-----------|------------|
|           | 8am   | 12am | 4pm |           |            |
| CONTROL 1 | 35    | 41   | 47  |           |            |
| CONTROL 2 | 33    | 48   | 46  |           |            |
| CONTROL 3 | 34    | 42   | 44  | 41.95     | 5.11       |
| CONTROL 4 | 40    | 42   | 42  |           |            |
| CONTROL 5 | 48    | 45   | 49  |           |            |
| CONTROL 6 | 43    | 43   | 46  |           |            |
| CONTROL 7 | 31    | 39   | 43  |           |            |
| MOTS-c 1  | 22    | 20   | 25  |           |            |
| MOTS-c 2  | 21    | 32   | 43  |           |            |
| MOTS-c 3  | 22    | 28   | 33  |           |            |
| MOTS-c 4  | 20    | 28   | 34  | 28.90     | 6.88       |
| MOTS-c 5  | 28    | 33   | 36  |           |            |
| MOTS-c 6  | 20    | 35   | 40  |           |            |
| MOTS-c 7  | 23    | 31   | 33  |           |            |
| TBI 1     | 18    | 12   | 21  |           |            |
| TBI 2     | 15    | 12   | 18  |           |            |
| TBI 3     | 8     | 14   | 16  |           |            |
| TBI 4     | 15    | 15   | 20  | 15.86     | 3.35       |
| TBI 5     | 15    | 12   | 18  |           |            |
| TBI 6     | 17    | 15   | 19  |           |            |
| TBI 7     | 13    | 20   | 20  |           |            |

Notes: M: mean; SD: standard deviation.

Supplementary table 4 Total distance (mm)

| group     | Day 1   | Day 2  | Day 3  | M       | SD     |
|-----------|---------|--------|--------|---------|--------|
| CONTROL 1 | 1586.60 | 1601.2 | 1633.9 |         |        |
| CONTROL 2 | 1675.40 | 1764.5 | 1745.7 | 1966.96 | 239.30 |
| CONTROL 3 | 1879.60 | 1925.2 | 1967.4 |         |        |
| CONTROL 4 | 2372.70 | 2368.3 | 2378.0 |         |        |

|           |         |         |         |         |        |
|-----------|---------|---------|---------|---------|--------|
| CONTROL 5 | 1994.50 | 2016.3  | 2021.2  |         |        |
| CONTROL 6 | 2096.70 | 2104.3  | 2137.6  |         |        |
| CONTROL 7 | 2021.30 | 2014.6  | 2001.1  |         |        |
| MOTS-c 1  | 1136.90 | 1201.8  | 1266.5  |         |        |
| MOTS-c 2  | 1299.40 | 1354.6  | 1501.8  |         |        |
| MOTS-c 3  | 1455.60 | 1577.1  | 1721.3  |         |        |
| MOTS-c 4  | 1476.40 | 1591.7  | 1658.3  | 1530.80 | 184.40 |
| MOTS-c 5  | 1557.80 | 1642.3  | 1721.5  |         |        |
| MOTS-c 6  | 1601.50 | 1587.2  | 1714.2  |         |        |
| MOTS-c 7  | 1583.30 | 1696.4  | 1801.10 |         |        |
| TBI 1     | 1201.10 | 1125.40 | 1113.90 |         |        |
| TBI 2     | 1121.30 | 987.60  | 1002.40 |         |        |
| TBI 3     | 1214.70 | 1302.50 | 1217.30 |         |        |
| TBI 4     | 1502.80 | 1398.40 | 1402.30 | 1210.65 | 138.40 |
| TBI 5     | 1292.70 | 1342.10 | 1320.10 |         |        |
| TBI 6     | 989.60  | 1134.30 | 1124.50 |         |        |
| TBI 7     | 1196.20 | 1237.40 | 1197.00 |         |        |

Notes: M: mean; SD: standard deviation.

### Supplementary table 5 DEGs of MOTS-c VS TBI groups

| Gene id            | Gene         | p           | q           | fc          | log2(fc)     | regulation | Significant |
|--------------------|--------------|-------------|-------------|-------------|--------------|------------|-------------|
| ENSMUSG00000078440 | Dohh         | 1.57598E-19 | 5.2961E-15  | 0.23980458  | -2.060068836 | down       | yes         |
| ENSMUSG00000047976 | Kcna1        | 6.62068E-17 | 1.11244E-12 | 0.24885454  | -2.00662539  | down       | yes         |
| ENSMUSG00000057036 | Gm7536       | 9.99935E-16 | 8.4007E-12  | 0.13963307  | -2.84028737  | down       | yes         |
| ENSMUSG00000033307 | Mif          | 2.3914E-11  | 5.74021E-08 | 0.29396922  | -1.766262987 | down       | yes         |
| ENSMUSG00000107705 | Gm45062      | 6.06134E-11 | 1.35794E-07 | 3.48685E-05 | -14.80771481 | down       | yes         |
| ENSMUSG00000004366 | Sst          | 2.09084E-08 | 2.12917E-05 | 0.45726009  | -1.128913069 | down       | yes         |
| ENSMUSG00000070003 | Ssbp4        | 2.15488E-08 | 2.12984E-05 | 0.34873847  | -1.519782556 | down       | yes         |
| ENSMUSG00000005268 | Prlr         | 1.1037E-07  | 7.89145E-05 | 0.21182445  | -2.239058966 | down       | yes         |
| ENSMUSG00000109061 | Gm49320      | 1.19879E-07 | 8.22151E-05 | 0.00059945  | -10.70406213 | down       | yes         |
| ENSMUSG00000014301 | Pam16        | 1.32806E-07 | 8.92588E-05 | 0.46191688  | -1.114294808 | down       | yes         |
| ENSMUSG00000024907 | Gal          | 1.37639E-07 | 9.06933E-05 | 0.00017937  | -12.44470088 | down       | yes         |
| ENSMUSG00000066278 | Vps37b       | 1.5337E-07  | 9.75676E-05 | 0.36364626  | -1.45939234  | down       | yes         |
| ENSMUSG00000103770 | Pcdha9       | 2.00964E-07 | 0.000116438 | 0.22700452  | -2.139207045 | down       | yes         |
| ENSMUSG00000092981 | Mir5125      | 2.90935E-07 | 0.00016294  | 0.43084082  | -1.214773143 | down       | yes         |
| ENSMUSG00000032997 | Chpf         | 4.7277E-07  | 0.00025624  | 0.29831640  | -1.745084765 | down       | yes         |
| ENSMUSG00000035835 | Plppr3       | 5.33743E-07 | 0.00028470  | 0.44786356  | -1.158868799 | down       | yes         |
| ENSMUSG00000023266 | Frs3         | 5.99063E-07 | 0.00030502  | 0.38850011  | -1.364013061 | down       | yes         |
| ENSMUSG00000030595 | Nfkbib       | 6.57628E-07 | 0.00032391  | 0.38114214  | -1.391598952 | down       | yes         |
| ENSMUSG00000024011 | Pi16         | 7.99717E-07 | 0.00037851  | 0.08572729  | -3.544101638 | down       | yes         |
| ENSMUSG00000060438 | Rps10-ps1    | 8.33434E-07 | 0.00038899  | 0.16329979  | -2.614405099 | down       | yes         |
| ENSMUSG00000049086 | Bmyc         | 2.7864E-06  | 0.001170461 | 0.29218886  | -1.775026899 | down       | yes         |
| ENSMUSG00000037692 | Ahdc1        | 3.04512E-06 | 0.00122089  | 0.40141469  | -1.316834675 | down       | yes         |
| ENSMUSG00000110483 | Gm45702      | 3.76819E-06 | 0.00145551  | 0.13247483  | -2.916209781 | down       | yes         |
| ENSMUSG00000022623 | Shank3       | 4.15558E-06 | 0.00155164  | 0.44919354  | -1.154590894 | down       | yes         |
| ENSMUSG00000027327 | 1700037H04Ri | 4.41537E-06 | 0.00159546  | 0.44499469  | -1.168139958 | down       | yes         |
| ENSMUSG00000022577 | Ly6h         | 5.22579E-06 | 0.00186123  | 0.48301839  | -1.049849949 | down       | yes         |
| ENSMUSG00000019433 | Gipc1        | 5.29801E-06 | 0.00186123  | 0.48117722  | -1.055359729 | down       | yes         |
| ENSMUSG00000028398 | Dmac1        | 5.31703E-06 | 0.00186123  | 0.43325979  | -1.206695715 | down       | yes         |
| ENSMUSG00000033768 | Nrxn2        | 7.67883E-06 | 0.00258047  | 0.47151756  | -1.084616579 | down       | yes         |

|                     |               |             |             |            |              |      |     |
|---------------------|---------------|-------------|-------------|------------|--------------|------|-----|
| ENSMUSG00000010205  | Raver1        | 7.81094E-06 | 0.00259887  | 0.43740616 | -1.192954545 | down | yes |
| ENSMUSG00000027551  | Zfp64         | 1.04541E-05 | 0.00331424  | 0.40148055 | -1.316597987 | down | yes |
| ENSMUSG00000058441  | Panx2         | 1.17815E-05 | 0.00366589  | 0.43711963 | -1.1938999   | down | yes |
| ENSMUSG00000022705  | Drd3          | 1.60874E-05 | 0.00482692  | 0.06113247 | -4.031917235 | down | yes |
| ENSMUSG00000028661  | Epha8         | 1.707E-05   | 0.00498814  | 0.28023471 | -1.835292428 | down | yes |
| ENSMUSG00000020153  | Ndufs7        | 2.02341E-05 | 0.00566639  | 0.43442767 | -1.202812077 | down | yes |
| ENSMUSG000000104318 | Pcdha7        | 2.78222E-05 | 0.00730441  | 0.32059977 | -1.641154677 | down | yes |
| ENSMUSG00000021848  | Otx2          | 2.86294E-05 | 0.00745805  | 0.09422551 | -3.407738477 | down | yes |
| ENSMUSG00000024330  | Col11a2       | 3.40354E-05 | 0.00860553  | 0.44895938 | -1.155343157 | down | yes |
| ENSMUSG00000027570  | Col9a3        | 3.61158E-05 | 0.00898532  | 0.32872079 | -1.605065384 | down | yes |
| ENSMUSG00000018821  | Avp1          | 3.9389E-05  | 0.00932159  | 0.38964977 | -1.359750095 | down | yes |
| ENSMUSG00000040972  | Igsf21        | 4.18718E-05 | 0.00970102  | 0.48263691 | -1.050989839 | down | yes |
| ENSMUSG00000031828  | Klhl36        | 4.2147E-05  | 0.00970102  | 0.34892149 | -1.519025613 | down | yes |
| ENSMUSG00000057342  | Sphk2         | 4.84777E-05 | 0.01056269  | 0.49821720 | -1.005153252 | down | yes |
| ENSMUSG00000087408  | Cers1         | 4.81158E-05 | 0.01056269  | 0.46817806 | -1.094870752 | down | yes |
| ENSMUSG00000041351  | Rap1gap       | 5.7278E-05  | 0.011684689 | 0.49675110 | -1.009404925 | down | yes |
| ENSMUSG00000052837  | Junb          | 5.8403E-05  | 0.011684689 | 0.36121476 | -1.469071227 | down | yes |
| ENSMUSG00000039477  | Tnrc18        | 7.8412E-05  | 0.01472087  | 0.48420003 | -1.046324914 | down | yes |
| ENSMUSG00000076614  | Ighg1         | 8.99177E-05 | 0.01631366  | 0.00103469 | -9.916578503 | down | yes |
| ENSMUSG00000036622  | Atp13a2       | 9.70782E-05 | 0.01681604  | 0.48962279 | -1.030257367 | down | yes |
| ENSMUSG00000067847  | Romo1         | 0.00010811  | 0.01789674  | 0.29414644 | -1.765393489 | down | yes |
| ENSMUSG00000039195  | 1110008P14Rik | 0.00012146  | 0.01954437  | 0.44719851 | -1.161012701 | down | yes |
| ENSMUSG00000023328  | Ache          | 0.00012682  | 0.02010284  | 0.45989450 | -1.120625124 | down | yes |
| ENSMUSG000000115483 | Gm9732        | 0.00013091  | 0.02055765  | 0.00077670 | -10.33033912 | down | yes |
| ENSMUSG00000093738  | Al606473      | 0.00013225  | 0.02067218  | 0.03487586 | -4.841627281 | down | yes |
| ENSMUSG00000023009  | Nckap5l       | 0.00013789  | 0.021159581 | 0.36820237 | -1.441429163 | down | yes |
| ENSMUSG00000078348  | Sf3b5         | 0.00016238  | 0.02382981  | 0.34662183 | -1.528565573 | down | yes |
| ENSMUSG00000029755  | Dlx5          | 0.00020977  | 0.02854061  | 0.18742649 | -2.415603168 | down | yes |
| ENSMUSG00000000120  | Ngfr          | 0.00022032  | 0.02926490  | 0.13594458 | -2.878909362 | down | yes |
| ENSMUSG00000033427  | downb1        | 0.00023286  | 0.03044993  | 0.15121554 | -2.725321677 | down | yes |
| ENSMUSG00000043635  | Adams3        | 0.00024090  | 0.031199678 | 0.44390586 | -1.171674324 | down | yes |
| ENSMUSG00000023911  | Flywh2        | 0.00027211  | 0.03301205  | 0.36911253 | -1.437867371 | down | yes |
| ENSMUSG00000024112  | Cacna1h       | 0.00027599  | 0.03325358  | 0.49524562 | -1.013783868 | down | yes |
| ENSMUSG00000041930  | Fam222a       | 0.00027608  | 0.03325358  | 0.32399476 | -1.625957599 | down | yes |
| ENSMUSG00000030669  | Calca         | 0.00029707  | 0.03442510  | 0.22681739 | -2.140396836 | down | yes |
| ENSMUSG00000040269  | Mrps28        | 0.00031168  | 0.03538579  | 0.47472412 | -1.074838713 | down | yes |
| ENSMUSG00000027820  | Mme           | 0.00037029  | 0.04027069  | 0.42079147 | -1.248822622 | down | yes |
| ENSMUSG0000002799   | Jag2          | 0.00037926  | 0.04085043  | 0.47434926 | -1.07597837  | down | yes |
| ENSMUSG00000021453  | Gadd45g       | 0.00038438  | 0.04126865  | 0.41158990 | -1.280720483 | down | yes |
| ENSMUSG00000099227  | Mir8114       | 0.00041678  | 0.04390660  | 0.00238770 | -8.710162283 | down | yes |
| ENSMUSG00000034739  | Mfrp          | 0.00045082  | 0.04661526  | 0.24066883 | -2.054878734 | down | yes |
| ENSMUSG00000020902  | Ntn1          | 0.00048935  | 0.04953283  | 0.46409141 | -1.107519082 | down | yes |
| ENSMUSG00000096929  | A330023F24Ri  | 7.29764E-16 | 8.17458E-12 | 3.10857099 | 1.636251529  | up   | yes |
| ENSMUSG00000028268  | Gbp3          | 2.50829E-15 | 1.68582E-11 | 2.52179576 | 1.334451438  | up   | yes |
| ENSMUSG00000075602  | Ly6a          | 2.16331E-14 | 1.21163E-10 | 2.31004084 | 1.207918363  | up   | yes |
| ENSMUSG00000074896  | Ifit3         | 1.17788E-13 | 5.45639E-10 | 2.69571340 | 1.430667122  | up   | yes |
| ENSMUSG00000079363  | Gbp4          | 1.29895E-13 | 5.45639E-10 | 2.62838551 | 1.394176896  | up   | yes |
| ENSMUSG00000027514  | Zbp1          | 3.69667E-13 | 1.3803E-09  | 5.95237517 | 2.573465461  | up   | yes |
| ENSMUSG00000045868  | Gvin1         | 1.23028E-12 | 4.13436E-09 | 2.71698305 | 1.442005568  | up   | yes |
| ENSMUSG00000078921  | Tgtp2         | 4.69049E-12 | 1.43295E-08 | 3.62769483 | 1.859053099  | up   | yes |
| ENSMUSG00000069874  | Irgm2         | 6.96883E-12 | 1.95156E-08 | 2.42416731 | 1.277489274  | up   | yes |
| ENSMUSG00000078606  | Gm4070        | 7.7124E-12  | 1.99366E-08 | 2.61427415 | 1.386410444  | up   | yes |
| ENSMUSG00000029561  | Oasl2         | 1.27763E-10 | 2.68342E-07 | 3.38335324 | 1.758453812  | up   | yes |
| ENSMUSG00000064215  | Ifi27         | 4.43349E-10 | 8.76396E-07 | 2.02719954 | 1.019488104  | up   | yes |
| ENSMUSG00000070327  | Rnf213        | 5.62872E-10 | 1.05085E-06 | 2.28393442 | 1.191521232  | up   | yes |
| ENSMUSG00000032690  | Oas2          | 1.70365E-09 | 2.86256E-06 | 4.18442515 | 2.065029444  | up   | yes |
| ENSMUSG00000043263  | Ifi209        | 3.08344E-09 | 4.93424E-06 | 4.99748971 | 2.321203598  | up   | yes |
| ENSMUSG000000105504 | Gbp5          | 3.50501E-09 | 5.12112E-06 | 2.14861535 | 1.103407236  | up   | yes |
| ENSMUSG00000073491  | Ifi213        | 3.96982E-09 | 5.55857E-06 | 6.83634575 | 2.773225364  | up   | yes |
| ENSMUSG00000073409  | H2-Q6         | 5.96839E-09 | 7.71415E-06 | 4.95918462 | 2.310102937  | up   | yes |
| ENSMUSG00000037921  | Ddx60         | 5.83274E-09 | 7.71415E-06 | 3.79936781 | 1.925759386  | up   | yes |

|                    |          |             |             |            |             |    |     |
|--------------------|----------|-------------|-------------|------------|-------------|----|-----|
| ENSMUSG00000100254 | Trpc2    | 1.00622E-08 | 1.25237E-05 | 3083.65    | 11.59042331 | up | yes |
| ENSMUSG00000024136 | Dnase1l2 | 1.19509E-08 | 1.38486E-05 | 2.01275839 | 1.009174008 | up | yes |
| ENSMUSG00000040483 | Xaf1     | 1.24176E-08 | 1.39098E-05 | 2.34934699 | 1.232259813 | up | yes |
| ENSMUSG00000029454 | Mapkapk5 | 1.60929E-08 | 1.69001E-05 | 3.82424466 | 1.935174825 | up | yes |
| ENSMUSG00000033355 | Rtp4     | 1.607E-08   | 1.69001E-05 | 3.16773462 | 1.66345148  | up | yes |
| ENSMUSG00000030653 | Gm45837  | 2.40996E-08 | 2.30809E-05 | 347.634319 | 8.441426708 | up | yes |
| ENSMUSG00000025492 | Ifitm3   | 2.47258E-08 | 2.30809E-05 | 3.05644828 | 1.611856155 | up | yes |
| ENSMUSG00000026222 | Sp100    | 4.37994E-08 | 3.97805E-05 | 2.28628175 | 1.193003209 | up | yes |
| ENSMUSG00000035692 | lsg15    | 4.87692E-08 | 4.31286E-05 | 3.25005711 | 1.70046507  | up | yes |
| ENSMUSG00000034459 | Ifit1    | 5.03339E-08 | 4.33711E-05 | 3.41276187 | 1.770939754 | up | yes |
| ENSMUSG00000062488 | Ifit3b   | 5.27061E-08 | 4.42797E-05 | 2.23370553 | 1.159439009 | up | yes |
| ENSMUSG00000087579 | Hectd2os | 5.9351E-08  | 4.74879E-05 | 6.24399590 | 2.642469591 | up | yes |
| ENSMUSG00000025498 | Irf7     | 6.21505E-08 | 4.85714E-05 | 3.82240437 | 1.934480409 | up | yes |
| ENSMUSG00000066861 | Oas1g    | 9.55967E-08 | 7.30119E-05 | 6.99293797 | 2.805898709 | up | yes |
| ENSMUSG00000033880 | Lgals3bp | 1.02626E-07 | 7.50551E-05 | 2.2328699  | 1.158899194 | up | yes |
| ENSMUSG00000024066 | Xdh      | 1.02739E-07 | 7.50551E-05 | 2.15697846 | 1.109011774 | up | yes |
| ENSMUSG00000035208 | Slfn8    | 1.17335E-07 | 8.21467E-05 | 3.11489368 | 1.639182923 | up | yes |
| ENSMUSG00000010358 | Ifi35    | 1.53878E-07 | 9.75676E-05 | 2.17926185 | 1.123839556 | up | yes |
| ENSMUSG00000030921 | Trim30a  | 1.7246E-07  | 0.00010537  | 2.52243006 | 1.334814269 | up | yes |
| ENSMUSG00000052776 | Oas1a    | 2.15089E-07 | 0.00012251  | 3.58416017 | 1.841635112 | up | yes |
| ENSMUSG00000034422 | Parp14   | 5.55598E-07 | 0.00029173  | 2.38848283 | 1.256094508 | up | yes |
| ENSMUSG00000026536 | Ifi211   | 5.98563E-07 | 0.00030502  | 5.58796058 | 2.482321845 | up | yes |
| ENSMUSG00000030107 | Usp18    | 6.65088E-07 | 0.00032391  | 3.31917587 | 1.730825076 | up | yes |
| ENSMUSG00000073490 | Ifi207   | 7.32828E-07 | 0.00035181  | 5.59399937 | 2.483880091 | up | yes |
| ENSMUSG00000017830 | Dhx58    | 1.29673E-06 | 0.00059693  | 2.36457045 | 1.241578128 | up | yes |
| ENSMUSG00000028270 | Gbp2     | 1.36433E-06 | 0.00061957  | 2.59518475 | 1.375837248 | up | yes |
| ENSMUSG00000078903 | Gm14391  | 1.46682E-06 | 0.00065723  | 2.52250645 | 1.33485796  | up | yes |
| ENSMUSG00000073489 | Ifi204   | 1.58405E-06 | 0.00070042  | 4.32495303 | 2.112684465 | up | yes |
| ENSMUSG00000056290 | Ms4a4b   | 1.83175E-06 | 0.00077918  | 21.5260645 | 4.428012683 | up | yes |
| ENSMUSG00000056144 | Trim34a  | 2.83339E-06 | 0.001175509 | 2.19541618 | 1.134494458 | up | yes |
| ENSMUSG00000026628 | Atf3     | 3.05178E-06 | 0.00122089  | 3.49812492 | 1.806581811 | up | yes |
| ENSMUSG00000090733 | Rps27    | 3.00606E-06 | 0.00122089  | 2.59244488 | 1.374313319 | up | yes |
| ENSMUSG00000029605 | Oas1b    | 4.02299E-06 | 0.00151901  | 3.86326720 | 1.949821467 | up | yes |
| ENSMUSG00000000049 | ApoH     | 4.22957E-06 | 0.00156070  | 2173.23563 | 11.08562889 | up | yes |
| ENSMUSG00000097654 | Gm26714  | 8.41707E-06 | 0.00274617  | 2115.45333 | 11.04675115 | up | yes |
| ENSMUSG00000058163 | Gm5431   | 8.7812E-06  | 0.00281040  | 3.85275525 | 1.94589054  | up | yes |
| ENSMUSG00000106247 | Gm43720  | 1.45319E-05 | 0.00439950  | 6.39434779 | 2.676797215 | up | yes |
| ENSMUSG00000018927 | Ccl6     | 1.85443E-05 | 0.00533316  | 2.12489921 | 1.087394412 | up | yes |
| ENSMUSG00000032596 | Uba7     | 2.06787E-05 | 0.00574302  | 2.02363081 | 1.016946111 | up | yes |
| ENSMUSG00000040170 | Fmo2     | 2.47882E-05 | 0.00655912  | 2.08656164 | 1.061127541 | up | yes |
| ENSMUSG00000116305 | Lncppara | 3.00349E-05 | 0.00770476  | 2.49026577 | 1.31629972  | up | yes |
| ENSMUSG00000030165 | Klrd1    | 4.87195E-05 | 0.01056269  | 1978.66639 | 10.95031268 | up | yes |
| ENSMUSG00000035370 | Gm49322  | 5.08822E-05 | 0.01068684  | 3.10085231 | 1.632664814 | up | yes |
| ENSMUSG00000079017 | Ifi2712a | 5.84148E-05 | 0.011684689 | 6.14614003 | 2.619680637 | up | yes |
| ENSMUSG00000028037 | Ifi44    | 5.75204E-05 | 0.011684689 | 4.81192849 | 2.266615203 | up | yes |
| ENSMUSG00000078922 | Tgtp1    | 6.21152E-05 | 0.01215209  | 2.74632101 | 1.457500273 | up | yes |
| ENSMUSG00000022014 | Epsti1   | 6.36779E-05 | 0.01229824  | 2.35178571 | 1.233756613 | up | yes |
| ENSMUSG00000063286 | Gm8995   | 6.55223E-05 | 0.01254085  | 2.02845525 | 1.02038148  | up | yes |
| ENSMUSG00000000386 | Mx1      | 8.28173E-05 | 0.01530652  | 2.98400568 | 1.577250284 | up | yes |
| ENSMUSG00000074151 | Nlrc5    | 8.6358E-05  | 0.01585825  | 3.01071403 | 1.590105685 | up | yes |
| ENSMUSG00000020641 | Rsad2    | 0.00011988  | 0.01946252  | 2.21733930 | 1.148829554 | up | yes |
| ENSMUSG00000038811 | Gngt2    | 0.00014887  | 0.02253570  | 2.40504555 | 1.266064219 | up | yes |
| ENSMUSG00000054072 | Ilgp1    | 0.00015377  | 0.02286536  | 2.45923656 | 1.298210522 | up | yes |
| ENSMUSG00000034947 | Tmem106a | 0.00015446  | 0.02286695  | 2.54046164 | 1.345090683 | up | yes |
| ENSMUSG00000112248 | Gm47910  | 0.00016762  | 0.02421614  | 702.413333 | 9.45617642  | up | yes |
| ENSMUSG00000104713 | Gbp6     | 0.00017103  | 0.02435464  | 2.21081022 | 1.144575188 | up | yes |
| ENSMUSG00000103092 | Pcdha5   | 0.00017533  | 0.02475626  | 2.27154966 | 1.183676847 | up | yes |
| ENSMUSG00000072620 | Slfn2    | 0.00018229  | 0.02563177  | 2.39828521 | 1.262003242 | up | yes |
| ENSMUSG00000040613 | Apobec1  | 0.00019298  | 0.02690996  | 2.10213621 | 1.071856158 | up | yes |
| ENSMUSG00000070034 | Sp110    | 0.00020558  | 0.02819809  | 2.19230947 | 1.132451468 | up | yes |
| ENSMUSG00000054404 | Slfn5    | 0.00020798  | 0.028411733 | 2.37852413 | 1.250066667 | up | yes |

|                    |              |            |            |            |             |    |     |
|--------------------|--------------|------------|------------|------------|-------------|----|-----|
| ENSMUSG00000064147 | Rab44        | 0.00027059 | 0.03301205 | 396.066362 | 8.62959837  | up | yes |
| ENSMUSG00000059089 | Fcgr4        | 0.00032158 | 0.03612883 | 3.00925440 | 1.589406078 | up | yes |
| ENSMUSG00000067577 | A430093F15Ri | 0.00036109 | 0.03965536 | 678.136985 | 9.40543292  | up | yes |
| ENSMUSG00000078153 | Psme2b       | 0.00036660 | 0.03999923 | 2.01293434 | 1.009300119 | up | yes |
| ENSMUSG00000024338 | Psmb8        | 0.00037690 | 0.04072629 | 2.42629774 | 1.278756602 | up | yes |
| ENSMUSG00000089929 | Bcl2a1b      | 0.00041166 | 0.04363981 | 2.12978539 | 1.090708064 | up | yes |
| ENSMUSG00000037580 | Gch1         | 0.00043070 | 0.04508997 | 2.78647822 | 1.478442877 | up | yes |
| ENSMUSG00000030577 | Cd22         | 0.00046245 | 0.04733994 | 3.29593619 | 1.720688312 | up | yes |

Notes: DEGs: Differentially Expressed Genes; p: p value; q: q value; fc: fold change.

### Supplementary table 6 The enriched pathways of DEGs

| Pathway ID | Pathway Name                                    | Rich Factor | Q value     | Significant (Q) |
|------------|-------------------------------------------------|-------------|-------------|-----------------|
| mmu04621   | NOD-like receptor signaling pathway             | 0.0663      | 4.60667E-13 | ****            |
| mmu05169   | Epstein-Barr virus infection                    | 0.0448      | 2.93449E-09 | ****            |
| mmu05160   | Hepatitis C                                     | 0.0467      | 2.04419E-07 | ****            |
| mmu05164   | Influenza A                                     | 0.0458      | 2.04419E-07 | ****            |
| mmu05162   | Measles                                         | 0.0451      | 2.28596E-06 | ****            |
| mmu05168   | Herpes simplex virus 1 infection                | 0.0198      | 7.13429E-06 | ****            |
| mmu04622   | RIG-I-like receptor signaling pathway           | 0.0678      | 5.14075E-05 | ****            |
| mmu04623   | Cytosolic DNA-sensing pathway                   | 0.0577      | 0.001414805 | **              |
| mmu04080   | Neuroactive ligand-receptor interaction         | 0.0156      | 0.00263165  | **              |
| mmu04612   | Antigen processing and presentation             | 0.0411      | 0.003108272 | **              |
| mmu04974   | Protein digestion and absorption                | 0.0361      | 0.004125995 | **              |
| mmu04060   | Cytokine-cytokine receptor interaction          | 0.015       | 0.010433031 | *               |
| mmu04650   | Natural killer cell mediated cytotoxicity       | 0.0242      | 0.01123492  | *               |
| mmu04010   | MAPK signaling pathway                          | 0.0137      | 0.012449166 | *               |
| mmu04514   | Cell adhesion molecules                         | 0.0196      | 0.017511021 | *               |
| mmu05165   | Human papillomavirus infection                  | 0.0119      | 0.017511021 | *               |
| mmu04151   | PI3K-Akt signaling pathway                      | 0.0118      | 0.017511021 | *               |
| mmu00600   | Sphingolipid metabolism                         | 0.0435      | 0.017511021 | *               |
| mmu05202   | Transcriptional misregulation in cancer         | 0.0175      | 0.017511021 | *               |
| mmu05332   | Graft-versus-host disease                       | 0.0417      | 0.017511021 | *               |
| mmu03050   | Proteasome                                      | 0.0435      | 0.017511021 | *               |
| mmu04062   | Chemokine signaling pathway                     | 0.016       | 0.020719371 | *               |
| mmu05167   | Kaposi sarcoma-associated herpesvirus infection | 0.016       | 0.020719371 | *               |
| mmu05203   | Viral carcinogenesis                            | 0.0142      | 0.026643334 | *               |
| mmu05140   | Leishmaniasis                                   | 0.0308      | 0.026643334 | *               |
| mmu04662   | B cell receptor signaling pathway               | 0.0286      | 0.029589025 | *               |
| mmu00983   | Drug metabolism - other enzymes                 | 0.026       | 0.034269672 | *               |
| mmu00232   | Caffeine metabolism                             | 0.2         | 0.037834625 | *               |
| mmu04658   | Th1 and Th2 cell differentiation                | 0.0233      | 0.03948157  | *               |
| mmu04640   | Hematopoietic cell lineage                      | 0.0225      | 0.040762671 | *               |
| mmu05032   | Morphine addiction                              | 0.022       | 0.041164655 | *               |
| mmu04713   | Circadian entrainment                           | 0.0208      | 0.044174913 | *               |

|          |                                     |        |             |   |
|----------|-------------------------------------|--------|-------------|---|
| mmu04925 | Aldosterone synthesis and secretion | 0.0198 | 0.047191979 | * |
|----------|-------------------------------------|--------|-------------|---|

Notes: DEGs: Differentially Expressed Genes; \*: p<0.05; \*\*: p<0.01; \*\*\*: p<0.001; \*\*\*\*: p<0.0001.

Supplementary table 7 DEMs of MOTS-c VS TBI groups

| HMDB        | Metabolite name      | VIP         | P value     | regulation | significant |
|-------------|----------------------|-------------|-------------|------------|-------------|
| HMDB0032231 | Dimethylethanolamine | 2.821352005 | 0.000283694 | down       | yes         |
|             |                      | 2.73740952  | 0.000753404 | down       | yes         |
|             |                      | 2.597937554 | 0.000856888 | down       | yes         |
|             |                      | 2.888207443 | 0.001395312 | down       | yes         |
| HMDB0000123 | Glycine              | 2.503363959 | 0.001879567 | down       | yes         |
|             |                      | 2.704342838 | 0.001930188 | down       | yes         |
|             |                      | 2.215092496 | 0.002124729 | down       | yes         |
|             |                      | 2.022490755 | 0.002209568 | down       | yes         |
|             |                      | 2.70203825  | 0.002288819 | down       | yes         |
|             |                      | 2.30219169  | 0.002550056 | down       | yes         |
|             |                      | 2.595185923 | 0.002561096 | down       | yes         |
|             |                      | 2.329819681 | 0.002573347 | down       | yes         |
|             |                      | 1.86713322  | 0.002898452 | down       | yes         |
|             |                      | 2.503555273 | 0.003111726 | down       | yes         |
|             |                      | 2.126184412 | 0.003163752 | down       | yes         |
|             |                      | 2.33457664  | 0.003469313 | down       | yes         |
|             |                      | 2.621949794 | 0.003526997 | down       | yes         |
|             |                      | 2.432743372 | 0.003817645 | down       | yes         |
|             |                      | 2.621159097 | 0.003915146 | down       | yes         |
|             |                      | 2.794214805 | 0.00397131  | down       | yes         |
|             |                      | 2.576602029 | 0.004076242 | down       | yes         |
|             |                      | 2.350146755 | 0.004135985 | down       | yes         |
|             |                      | 2.195032099 | 0.004320259 | down       | yes         |
|             |                      | 2.579451778 | 0.004416405 | down       | yes         |
|             |                      | 2.475324201 | 0.004530228 | down       | yes         |
|             |                      | 2.496764805 | 0.004549787 | down       | yes         |
|             |                      | 2.270184187 | 0.004690052 | down       | yes         |
| 2.192751126 | 0.004931676          | down        | yes         |            |             |
| 2.227365479 | 0.005053274          | down        | yes         |            |             |
| 2.388289702 | 0.005098676          | down        | yes         |            |             |
| 2.379576395 | 0.005169646          | down        | yes         |            |             |
| 2.249765866 | 0.005431724          | down        | yes         |            |             |
| HMDB0031004 | Diatretin 2          | 2.383770699 | 0.005535939 | down       | yes         |
|             |                      | 2.170147634 | 0.005703581 | down       | yes         |
|             |                      | 2.143876126 | 0.005835642 | down       | yes         |
|             |                      | 2.373664376 | 0.006021024 | down       | yes         |
|             |                      | 1.85824927  | 0.006023892 | down       | yes         |
|             |                      | 2.228662973 | 0.006215177 | down       | yes         |
|             |                      | 2.33680669  | 0.006312163 | down       | yes         |
|             |                      | 2.502613677 | 0.006542304 | down       | yes         |
|             |                      | 2.310193058 | 0.006573191 | down       | yes         |
|             |                      | 2.307345127 | 0.006879567 | down       | yes         |
|             |                      | 2.11845396  | 0.007013191 | down       | yes         |
|             |                      | 2.081068777 | 0.007422792 | down       | yes         |
|             |                      | 1.911174016 | 0.007680523 | down       | yes         |
|             |                      | 2.205889612 | 0.007860007 | down       | yes         |
|             |                      | 2.310377801 | 0.007901345 | down       | yes         |
|             |                      | 2.379429646 | 0.007925159 | down       | yes         |
|             |                      | 2.207979167 | 0.007944493 | down       | yes         |
| 2.283283038 | 0.008077797          | down        | yes         |            |             |
| 2.547869859 | 0.008323066          | down        | yes         |            |             |

|             |                                               |             |             |      |     |
|-------------|-----------------------------------------------|-------------|-------------|------|-----|
|             |                                               | 2.062242244 | 0.008506621 | down | yes |
|             |                                               | 2.23955332  | 0.008559824 | down | yes |
|             |                                               | 1.980525037 | 0.008592402 | down | yes |
|             |                                               | 2.06834008  | 0.008656086 | down | yes |
|             |                                               | 2.170478361 | 0.008794611 | down | yes |
|             |                                               | 2.389950741 | 0.008995538 | down | yes |
| HMDB0125371 | 2-(3,4-dihydroxyphenyl)-3,5,7-trihydroxy-3,4- | 1.760038424 | 0.00901561  | down | yes |
|             |                                               | 2.221267267 | 0.009158855 | down | yes |
|             |                                               | 2.233054853 | 0.009286621 | down | yes |
|             |                                               | 1.928664682 | 0.009302548 | down | yes |
|             |                                               | 2.390497658 | 0.00938244  | down | yes |
|             |                                               | 2.389093874 | 0.009436041 | down | yes |
|             |                                               | 1.636718912 | 0.009493245 | down | yes |
|             |                                               | 2.141388988 | 0.009780805 | down | yes |
|             |                                               | 2.238176868 | 0.009830311 | down | yes |
|             |                                               | 2.075675262 | 0.009991662 | down | yes |
|             |                                               | 2.278322166 | 0.010106944 | down | yes |
|             |                                               | 1.737152667 | 0.010186458 | down | yes |
|             |                                               | 2.433747537 | 0.010290299 | down | yes |
|             |                                               | 2.453138049 | 0.01048556  | down | yes |
|             |                                               | 2.385103691 | 0.010649727 | down | yes |
|             |                                               | 1.920196511 | 0.010739228 | down | yes |
|             |                                               | 2.048333795 | 0.01074575  | down | yes |
|             |                                               | 2.021497478 | 0.010879772 | down | yes |
|             |                                               | 2.29277936  | 0.010923438 | down | yes |
|             |                                               | 1.98952551  | 0.011240411 | down | yes |
|             |                                               | 2.549842671 | 0.011420969 | down | yes |
|             |                                               | 2.03022719  | 0.011576267 | down | yes |
|             |                                               | 2.173878789 | 0.012163172 | down | yes |
|             |                                               | 2.102831844 | 0.012168746 | down | yes |
|             |                                               | 2.146643072 | 0.012434448 | down | yes |
|             |                                               | 1.936297897 | 0.012480244 | down | yes |
|             |                                               | 2.041291395 | 0.012752377 | down | yes |
|             |                                               | 2.251956362 | 0.013175464 | down | yes |
|             |                                               | 1.903038719 | 0.013298289 | down | yes |
|             |                                               | 2.176256711 | 0.013452572 | down | yes |
|             |                                               | 2.012136948 | 0.013518814 | down | yes |
|             |                                               | 2.332748524 | 0.013521273 | down | yes |
|             |                                               | 2.280293837 | 0.013786872 | down | yes |
|             |                                               | 2.286746326 | 0.01381145  | down | yes |
|             |                                               | 2.062855991 | 0.014024388 | down | yes |
|             |                                               | 2.318723654 | 0.014133378 | down | yes |
|             |                                               | 2.512472497 | 0.014179229 | down | yes |
|             |                                               | 1.816564203 | 0.014635704 | down | yes |
|             | Nimustine (hydrochloride)                     | 2.495412264 | 0.014755785 | down | yes |
|             |                                               | 1.936731274 | 0.01479426  | down | yes |
|             |                                               | 1.870600087 | 0.014858807 | down | yes |
|             |                                               | 1.391371309 | 0.014975375 | down | yes |
|             |                                               | 1.906827485 | 0.015099946 | down | yes |
|             |                                               | 1.733329051 | 0.015268998 | down | yes |
|             |                                               | 1.945248615 | 0.015286423 | down | yes |
|             | 2-Propylpiperidine                            | 2.237349926 | 0.015315643 | down | yes |
|             |                                               | 2.156484823 | 0.015387848 | down | yes |
|             |                                               | 1.944716062 | 0.015461136 | down | yes |
|             |                                               | 2.340214002 | 0.015540448 | down | yes |
|             |                                               | 2.201413597 | 0.015666661 | down | yes |
|             |                                               | 2.172182847 | 0.015776552 | down | yes |
|             |                                               | 2.219749799 | 0.015876396 | down | yes |
|             |                                               | 2.360746388 | 0.016052512 | down | yes |
|             |                                               | 2.468868383 | 0.016072552 | down | yes |
|             |                                               | 1.639919526 | 0.016082031 | down | yes |



|             |                    |             |             |      |     |
|-------------|--------------------|-------------|-------------|------|-----|
|             |                    | 2.05704561  | 0.016148166 | down | yes |
|             |                    | 2.308764674 | 0.016161417 | down | yes |
|             |                    | 1.848933921 | 0.016669246 | down | yes |
|             |                    | 1.673420584 | 0.016871327 | down | yes |
|             |                    | 1.679750032 | 0.017085673 | down | yes |
|             |                    | 2.02690743  | 0.017305772 | down | yes |
|             |                    | 1.582422563 | 0.017390266 | down | yes |
|             |                    | 2.350726987 | 0.017566331 | down | yes |
|             |                    | 2.161115267 | 0.017569748 | down | yes |
|             |                    | 1.980537111 | 0.017643998 | down | yes |
|             |                    | 2.140626547 | 0.018243544 | down | yes |
|             |                    | 1.971385599 | 0.018503125 | down | yes |
|             |                    | 2.10349421  | 0.018566217 | down | yes |
|             |                    | 1.877167567 | 0.018790812 | down | yes |
|             |                    | 1.996693257 | 0.01887683  | down | yes |
|             |                    | 1.75973598  | 0.019297302 | down | yes |
|             |                    | 2.44655547  | 0.01940395  | down | yes |
|             |                    | 1.779656249 | 0.019405253 | down | yes |
|             |                    | 2.249458564 | 0.019565149 | down | yes |
|             |                    | 2.331474013 | 0.01965807  | down | yes |
| HMDB0240280 | Mesylate           | 2.540062889 | 0.019747326 | down | yes |
|             |                    | 2.019423205 | 0.01977392  | down | yes |
|             |                    | 1.737173782 | 0.019801291 | down | yes |
|             |                    | 2.163258241 | 0.020185262 | down | yes |
|             |                    | 2.051347652 | 0.020731608 | down | yes |
|             |                    | 2.045201511 | 0.020991542 | down | yes |
|             |                    | 2.16803033  | 0.021141624 | down | yes |
|             |                    | 2.142791266 | 0.021249638 | down | yes |
|             |                    | 2.412448517 | 0.021339444 | down | yes |
|             |                    | 2.326226682 | 0.021423963 | down | yes |
|             |                    | 2.27457312  | 0.021442991 | down | yes |
|             |                    | 2.122012315 | 0.021557087 | down | yes |
|             |                    | 1.799350641 | 0.021714076 | down | yes |
|             |                    | 2.127835596 | 0.021721607 | down | yes |
|             |                    | 1.852337554 | 0.021727281 | down | yes |
|             |                    | 2.275664941 | 0.02227766  | down | yes |
|             |                    | 1.620727627 | 0.022284199 | down | yes |
|             |                    | 1.821357985 | 0.022328942 | down | yes |
|             |                    | 2.221873521 | 0.022482354 | down | yes |
|             |                    | 2.222572059 | 0.022546614 | down | yes |
|             |                    | 2.069887302 | 0.0226785   | down | yes |
|             |                    | 1.664054455 | 0.022717772 | down | yes |
|             |                    | 1.871525112 | 0.022930327 | down | yes |
|             |                    | 2.252569966 | 0.022946018 | down | yes |
|             |                    | 1.904112723 | 0.023083441 | down | yes |
|             |                    | 1.977030903 | 0.023161436 | down | yes |
|             |                    | 1.830269925 | 0.023580105 | down | yes |
|             |                    | 2.008449701 | 0.023673465 | down | yes |
|             |                    | 1.985081449 | 0.023802538 | down | yes |
|             |                    | 1.860630992 | 0.023922391 | down | yes |
|             |                    | 1.801861743 | 0.023999442 | down | yes |
|             |                    | 2.020245153 | 0.02408834  | down | yes |
|             |                    | 1.632336919 | 0.02442585  | down | yes |
|             |                    | 2.128547976 | 0.024925085 | down | yes |
|             |                    | 1.406284098 | 0.025041788 | down | yes |
| HMDB0000202 | Methylmalonic acid | 1.698986726 | 0.025162608 | down | yes |
|             |                    | 1.883155672 | 0.025170318 | down | yes |
|             |                    | 2.30035463  | 0.025461841 | down | yes |
|             |                    | 2.139616177 | 0.025480084 | down | yes |
|             |                    | 1.448590946 | 0.025588668 | down | yes |
|             |                    | 1.70567357  | 0.025636372 | down | yes |

|             |                                    |             |             |      |     |
|-------------|------------------------------------|-------------|-------------|------|-----|
|             |                                    | 1.716240356 | 0.025672497 | down | yes |
|             |                                    | 1.988821459 | 0.025740387 | down | yes |
|             |                                    | 2.359122937 | 0.025802971 | down | yes |
|             |                                    | 2.143495061 | 0.026126908 | down | yes |
|             |                                    | 2.043001717 | 0.026289042 | down | yes |
| HMDB0008064 | PC(18:1(11Z)/14:0)                 | 1.988850139 | 0.026305933 | down | yes |
| HMDB0001062 | N-Acetyl-D-Glucosamine 6-Phosphate | 1.840892391 | 0.026336294 | down | yes |
|             |                                    | 1.737307682 | 0.026341157 | down | yes |
|             |                                    | 2.016641103 | 0.026400275 | down | yes |
|             |                                    | 2.034232412 | 0.026555261 | down | yes |
|             |                                    | 1.916357189 | 0.02682194  | down | yes |
| HMDB0010169 | SM(d18:1/16:0)                     | 2.116963599 | 0.026902083 | down | yes |
|             |                                    | 2.12090048  | 0.027038037 | down | yes |
|             |                                    | 2.206491475 | 0.027039923 | down | yes |
|             |                                    | 1.887917286 | 0.027071895 | down | yes |
|             |                                    | 2.194142523 | 0.02719234  | down | yes |
|             |                                    | 1.706768208 | 0.027703742 | down | yes |
|             |                                    | 1.909993024 | 0.028097158 | down | yes |
| HMDB0034777 | Epidermin                          | 2.141012542 | 0.028097262 | down | yes |
|             |                                    | 1.921499619 | 0.029133081 | down | yes |
|             |                                    | 2.10972483  | 0.029185492 | down | yes |
|             |                                    | 2.142627024 | 0.029367531 | down | yes |
|             |                                    | 2.14219938  | 0.029444701 | down | yes |
|             |                                    | 1.963407776 | 0.029488725 | down | yes |
|             |                                    | 2.284788884 | 0.029810891 | down | yes |
| HMDB0010396 | LysoPC(20:4(8Z,11Z,14Z,17Z))       | 1.920072469 | 0.030511193 | down | yes |
|             |                                    | 1.692574279 | 0.030518672 | down | yes |
|             |                                    | 2.041386009 | 0.030618489 | down | yes |
|             |                                    | 1.952844746 | 0.030859317 | down | yes |
|             |                                    | 1.95199571  | 0.031411647 | down | yes |
|             |                                    | 1.71399004  | 0.031507978 | down | yes |
|             |                                    | 1.959639337 | 0.031553563 | down | yes |
|             |                                    | 1.882611776 | 0.031582421 | down | yes |
|             |                                    | 1.848355051 | 0.03158842  | down | yes |
|             |                                    | 1.943206277 | 0.031789799 | down | yes |
|             |                                    | 1.746427899 | 0.031862698 | down | yes |
|             |                                    | 1.703648891 | 0.031897502 | down | yes |
|             | 3-Aminobenzamide                   | 1.624750489 | 0.032162635 | down | yes |
|             |                                    | 2.043070779 | 0.032450843 | down | yes |
|             |                                    | 1.70934942  | 0.03246392  | down | yes |
|             |                                    | 2.056656962 | 0.032627449 | down | yes |
|             |                                    | 1.532585978 | 0.033733596 | down | yes |
|             |                                    | 2.100923775 | 0.033914412 | down | yes |
|             |                                    | 1.916652231 | 0.034127096 | down | yes |
|             |                                    | 1.78167661  | 0.0341712   | down | yes |
|             |                                    | 1.730646011 | 0.034185373 | down | yes |
|             |                                    | 2.192734877 | 0.034290954 | down | yes |
|             |                                    | 2.287199147 | 0.034606691 | down | yes |
|             |                                    | 1.585183634 | 0.034743014 | down | yes |
|             |                                    | 1.692314594 | 0.034786618 | down | yes |
|             |                                    | 2.062122531 | 0.03508695  | down | yes |
|             |                                    | 1.990901065 | 0.03533604  | down | yes |
|             |                                    | 2.017316894 | 0.035447218 | down | yes |
|             |                                    | 2.071909141 | 0.035580718 | down | yes |
|             |                                    | 1.878957767 | 0.035725768 | down | yes |
|             |                                    | 1.532145033 | 0.035755688 | down | yes |
|             |                                    | 1.858176827 | 0.03578536  | down | yes |
|             |                                    | 1.734242427 | 0.035939706 | down | yes |
|             |                                    | 2.138915973 | 0.036370738 | down | yes |
|             |                                    | 1.560748233 | 0.036651609 | down | yes |
|             |                                    | 2.056356013 | 0.036667378 | down | yes |

|             |                                       |             |             |      |     |
|-------------|---------------------------------------|-------------|-------------|------|-----|
|             |                                       | 2.270876648 | 0.036774863 | down | yes |
|             |                                       | 1.621748665 | 0.03679006  | down | yes |
|             | Kifunensine                           | 2.33046411  | 0.037249019 | down | yes |
|             |                                       | 2.115881206 | 0.037268462 | down | yes |
|             |                                       | 1.883672598 | 0.037953179 | down | yes |
| HMDB0009454 | PE(20:5(5Z,8Z,11Z,14Z,17Z)/18:1(11Z)) | 1.97700702  | 0.038143954 | down | yes |
|             |                                       | 1.838733393 | 0.038154143 | down | yes |
| HMDB0059611 | Thiomorpholine 3-carboxylate          | 2.15809825  | 0.038363135 | down | yes |
|             |                                       | 1.700786378 | 0.038402232 | down | yes |
|             |                                       | 1.546609222 | 0.038482176 | down | yes |
|             |                                       | 1.889841671 | 0.038601037 | down | yes |
|             |                                       | 1.84391127  | 0.038807551 | down | yes |
|             |                                       | 1.757236094 | 0.039012776 | down | yes |
|             |                                       | 2.090184109 | 0.039049283 | down | yes |
|             |                                       | 1.78537979  | 0.039501131 | down | yes |
|             |                                       | 2.242819026 | 0.039723319 | down | yes |
|             |                                       | 1.828368387 | 0.039860455 | down | yes |
|             |                                       | 1.756822014 | 0.040274222 | down | yes |
|             |                                       | 1.526157159 | 0.040348596 | down | yes |
|             |                                       | 1.533855207 | 0.040564088 | down | yes |
|             |                                       | 1.718215258 | 0.040668604 | down | yes |
|             |                                       | 1.997577954 | 0.041120108 | down | yes |
|             |                                       | 1.821334628 | 0.041144832 | down | yes |
|             |                                       | 1.869597624 | 0.041253139 | down | yes |
|             |                                       | 1.734296087 | 0.041408405 | down | yes |
|             |                                       | 2.228397012 | 0.041488208 | down | yes |
|             |                                       | 1.654520903 | 0.041840714 | down | yes |
| HMDB0003411 | D-Proline                             | 1.806841637 | 0.041870291 | down | yes |
|             |                                       | 1.68243216  | 0.042000185 | down | yes |
|             |                                       | 2.112404286 | 0.042091715 | down | yes |
|             |                                       | 1.977674057 | 0.04212705  | down | yes |
|             |                                       | 1.608289166 | 0.04216883  | down | yes |
|             |                                       | 1.297676733 | 0.042401434 | down | yes |
|             |                                       | 1.749026251 | 0.042410728 | down | yes |
|             |                                       | 1.944535425 | 0.042860591 | down | yes |
|             |                                       | 1.973757032 | 0.042979373 | down | yes |
|             |                                       | 2.005341265 | 0.043269281 | down | yes |
|             |                                       | 1.498840302 | 0.043495907 | down | yes |
|             |                                       | 2.189009303 | 0.043579334 | down | yes |
|             |                                       | 2.083156228 | 0.043777645 | down | yes |
|             |                                       | 2.061660224 | 0.044125209 | down | yes |
|             |                                       | 1.962418261 | 0.04419214  | down | yes |
|             |                                       | 1.909402989 | 0.044337168 | down | yes |
|             |                                       | 2.028960875 | 0.045069912 | down | yes |
|             |                                       | 2.114123006 | 0.045475201 | down | yes |
|             | S-1-Propenyl-L-cysteine               | 2.127759222 | 0.045826135 | down | yes |
|             |                                       | 1.824859231 | 0.045964589 | down | yes |
|             |                                       | 1.786755652 | 0.04639608  | down | yes |
|             |                                       | 1.830846281 | 0.046469965 | down | yes |
|             |                                       | 1.473154001 | 0.046514293 | down | yes |
| HMDB0000904 | Citrulline                            | 1.941879457 | 0.046572475 | down | yes |
|             |                                       | 1.595959244 | 0.046578    | down | yes |
|             |                                       | 1.890293816 | 0.046678699 | down | yes |
|             |                                       | 2.018838023 | 0.046803303 | down | yes |
|             |                                       | 1.758633089 | 0.046863764 | down | yes |
|             |                                       | 1.926355146 | 0.047256387 | down | yes |
|             |                                       | 1.681227126 | 0.047557489 | down | yes |
| HMDB0000300 | Uracil                                | 1.958704593 | 0.047670873 | down | yes |
| HMDB0061695 | 1-Palmitoylglycerophosphoinositol     | 1.877576166 | 0.048010551 | down | yes |
|             |                                       | 2.040886582 | 0.048369912 | down | yes |
|             |                                       | 1.831332438 | 0.048389747 | down | yes |

|             |                                          |             |             |      |     |
|-------------|------------------------------------------|-------------|-------------|------|-----|
|             |                                          | 1.927048379 | 0.048646383 | down | yes |
|             |                                          | 1.602634357 | 0.048719988 | down | yes |
|             |                                          | 1.931266592 | 0.048939743 | down | yes |
|             |                                          | 1.964705361 | 0.049119053 | down | yes |
|             |                                          | 2.035001916 | 0.049249818 | down | yes |
|             |                                          | 1.708504983 | 0.04928279  | down | yes |
|             |                                          | 1.657343064 | 0.04928653  | down | yes |
|             |                                          | 2.054589945 | 0.049387963 | down | yes |
| HMDB0032255 | N-[(Ethoxycarbonyl)methyl]-p-menthane-3- | 1.822868759 | 0.049681661 | down | yes |
|             |                                          | 2.408879463 | 0.000409922 | up   | yes |
|             |                                          | 2.803558811 | 0.000491415 | up   | yes |
|             |                                          | 2.811715157 | 0.000538638 | up   | yes |
|             |                                          | 2.806633966 | 0.000561405 | up   | yes |
|             |                                          | 2.789318032 | 0.000660928 | up   | yes |
|             |                                          | 2.607224912 | 0.000661617 | up   | yes |
|             |                                          | 2.661600977 | 0.000731593 | up   | yes |
|             |                                          | 2.759600729 | 0.000811529 | up   | yes |
|             |                                          | 2.735914063 | 0.00083193  | up   | yes |
|             |                                          | 2.703301661 | 0.001471705 | up   | yes |
|             |                                          | 2.462334782 | 0.001484956 | up   | yes |
| HMDB0000101 | Deoxyadenosine                           | 2.593163018 | 0.001687792 | up   | yes |
|             |                                          | 2.505664403 | 0.001693801 | up   | yes |
| HMDB0000050 | Adenosine                                | 2.665599684 | 0.001866762 | up   | yes |
| HMDB0032593 | 4-(Hydroxymethyl)benzenediazonium(1+)    | 2.668893672 | 0.0018891   | up   | yes |
|             |                                          | 2.39956734  | 0.002547344 | up   | yes |
|             |                                          | 2.381362148 | 0.002802227 | up   | yes |
|             |                                          | 2.574314275 | 0.002907817 | up   | yes |
|             |                                          | 2.264900099 | 0.003207329 | up   | yes |
|             |                                          | 2.368352563 | 0.003468416 | up   | yes |
|             |                                          | 2.537488499 | 0.003629429 | up   | yes |
|             |                                          | 1.860758712 | 0.003696873 | up   | yes |
|             |                                          | 2.65044491  | 0.004107578 | up   | yes |
|             |                                          | 2.638517646 | 0.00433689  | up   | yes |
|             |                                          | 2.424377531 | 0.004476935 | up   | yes |
|             |                                          | 2.192980765 | 0.004897572 | up   | yes |
|             |                                          | 2.458945684 | 0.005025504 | up   | yes |
|             |                                          | 2.465755864 | 0.005742115 | up   | yes |
|             |                                          | 2.119788374 | 0.006872236 | up   | yes |
|             |                                          | 1.854536546 | 0.0076583   | up   | yes |
|             |                                          | 2.495930238 | 0.007932851 | up   | yes |
|             |                                          | 2.425125224 | 0.007979132 | up   | yes |
|             |                                          | 2.316135126 | 0.008438243 | up   | yes |
|             |                                          | 2.276366014 | 0.008630997 | up   | yes |
|             |                                          | 2.335241957 | 0.00866854  | up   | yes |
|             |                                          | 2.285326806 | 0.008737097 | up   | yes |
|             |                                          | 1.935716039 | 0.008863252 | up   | yes |
|             |                                          | 2.485714192 | 0.00901468  | up   | yes |
|             |                                          | 1.887730772 | 0.009119628 | up   | yes |
|             |                                          | 2.434759966 | 0.009479247 | up   | yes |
|             |                                          | 2.152859705 | 0.009780439 | up   | yes |
|             |                                          | 2.496899377 | 0.010074526 | up   | yes |
|             |                                          | 2.419423807 | 0.010086146 | up   | yes |
|             |                                          | 2.101422407 | 0.010355632 | up   | yes |
|             |                                          | 2.249111755 | 0.010453692 | up   | yes |
|             |                                          | 2.228379227 | 0.010485877 | up   | yes |
|             |                                          | 2.181801744 | 0.010862066 | up   | yes |
|             |                                          | 2.01186061  | 0.010970616 | up   | yes |
|             |                                          | 2.387706763 | 0.011573418 | up   | yes |
|             |                                          | 2.184556219 | 0.011618804 | up   | yes |
|             |                                          | 2.272349988 | 0.01171744  | up   | yes |
| HMDB0000247 | Sorbitol                                 | 2.022951537 | 0.011929195 | up   | yes |

|                                 |             |             |    |     |
|---------------------------------|-------------|-------------|----|-----|
|                                 | 2.1398392   | 0.012240911 | up | yes |
|                                 | 2.157414192 | 0.0123401   | up | yes |
|                                 | 2.194799749 | 0.012627798 | up | yes |
|                                 | 2.373157868 | 0.012918115 | up | yes |
|                                 | 2.286896358 | 0.013634378 | up | yes |
|                                 | 2.307520892 | 0.013880281 | up | yes |
|                                 | 1.385275706 | 0.014014261 | up | yes |
|                                 | 2.296233458 | 0.01434704  | up | yes |
|                                 | 2.50655685  | 0.014544756 | up | yes |
|                                 | 1.948295161 | 0.014678    | up | yes |
|                                 | 2.313181736 | 0.014778351 | up | yes |
|                                 | 2.154804836 | 0.01477856  | up | yes |
|                                 | 2.321929063 | 0.014848547 | up | yes |
|                                 | 1.893151314 | 0.014993655 | up | yes |
|                                 | 2.379929907 | 0.015217763 | up | yes |
|                                 | 2.231105614 | 0.01606771  | up | yes |
|                                 | 2.293804523 | 0.016529598 | up | yes |
|                                 | 2.017160151 | 0.016794377 | up | yes |
|                                 | 1.963155222 | 0.017059106 | up | yes |
| 3-Hydroxy-3-methylglutaric acid | 2.175414136 | 0.017260586 | up | yes |
|                                 | 1.732784498 | 0.018449686 | up | yes |
|                                 | 2.003671847 | 0.01867844  | up | yes |
|                                 | 2.228546013 | 0.018741903 | up | yes |
|                                 | 1.893932728 | 0.01915022  | up | yes |
|                                 | 2.308932915 | 0.019488521 | up | yes |
|                                 | 1.924457429 | 0.020663182 | up | yes |
|                                 | 2.27177848  | 0.020836563 | up | yes |
|                                 | 1.828202469 | 0.020904389 | up | yes |
|                                 | 2.036817283 | 0.021298945 | up | yes |
|                                 | 2.320753308 | 0.021478255 | up | yes |
|                                 | 2.136863076 | 0.022184431 | up | yes |
|                                 | 1.845340018 | 0.022918368 | up | yes |
|                                 | 1.73321476  | 0.023173132 | up | yes |
|                                 | 1.862895656 | 0.023378018 | up | yes |
|                                 | 2.271849409 | 0.023577029 | up | yes |
|                                 | 1.621468366 | 0.023983545 | up | yes |
|                                 | 1.953897094 | 0.024120252 | up | yes |
|                                 | 1.940607364 | 0.024405063 | up | yes |
|                                 | 2.288761228 | 0.024661283 | up | yes |
|                                 | 2.02335716  | 0.025078911 | up | yes |
|                                 | 2.138361385 | 0.025732118 | up | yes |
|                                 | 2.280708858 | 0.025746226 | up | yes |
|                                 | 2.16929691  | 0.025754954 | up | yes |
|                                 | 1.52121349  | 0.025969912 | up | yes |
|                                 | 1.675608009 | 0.0260818   | up | yes |
|                                 | 1.865936273 | 0.026327288 | up | yes |
| D-(+)-Mannose                   | 1.875075204 | 0.026510011 | up | yes |
|                                 | 1.557832053 | 0.026645982 | up | yes |
|                                 | 2.264755074 | 0.026704563 | up | yes |
|                                 | 1.728009406 | 0.026824424 | up | yes |
|                                 | 2.188882737 | 0.026897984 | up | yes |
|                                 | 1.798187622 | 0.02753598  | up | yes |
|                                 | 1.688626789 | 0.028054124 | up | yes |
|                                 | 2.137248161 | 0.028376226 | up | yes |
|                                 | 2.158011469 | 0.029008124 | up | yes |
|                                 | 1.787418364 | 0.029018043 | up | yes |
|                                 | 1.845728132 | 0.029068449 | up | yes |
|                                 | 1.988540785 | 0.029279004 | up | yes |
|                                 | 2.017051328 | 0.029348311 | up | yes |
|                                 | 1.696971355 | 0.029516171 | up | yes |
|                                 | 2.099387695 | 0.029533509 | up | yes |

|             |                                |             |             |    |     |
|-------------|--------------------------------|-------------|-------------|----|-----|
|             |                                | 2.318217563 | 0.029585885 | up | yes |
|             |                                | 1.823075695 | 0.029737556 | up | yes |
|             |                                | 1.832087866 | 0.029812435 | up | yes |
|             |                                | 1.849657969 | 0.030176693 | up | yes |
|             |                                | 1.884173192 | 0.030329081 | up | yes |
|             |                                | 1.850793826 | 0.031563809 | up | yes |
|             |                                | 2.150992905 | 0.031822277 | up | yes |
|             |                                | 2.135323257 | 0.032005234 | up | yes |
|             |                                | 1.46264195  | 0.032171874 | up | yes |
|             |                                | 2.07801907  | 0.032645531 | up | yes |
|             |                                | 2.181570519 | 0.032900025 | up | yes |
|             |                                | 2.143702102 | 0.032941215 | up | yes |
|             |                                | 1.747449853 | 0.03358861  | up | yes |
|             |                                | 2.289757379 | 0.03365383  | up | yes |
|             |                                | 1.934406347 | 0.033830084 | up | yes |
| HMDB0000114 | Glycerolphosphorylethanolamine | 2.106169743 | 0.034110186 | up | yes |
|             |                                | 1.695595402 | 0.034116398 | up | yes |
|             |                                | 1.981270258 | 0.034730251 | up | yes |
|             |                                | 1.893245812 | 0.035068943 | up | yes |
|             |                                | 2.088124468 | 0.035409006 | up | yes |
|             |                                | 2.073665638 | 0.03596806  | up | yes |
|             |                                | 1.748138704 | 0.036214435 | up | yes |
|             |                                | 1.87809325  | 0.036568767 | up | yes |
| HMDB0000086 | Glycerophosphocholine          | 2.061136288 | 0.037038603 | up | yes |
|             |                                | 1.6508035   | 0.037048389 | up | yes |
|             |                                | 2.207011059 | 0.03726192  | up | yes |
|             |                                | 1.755610491 | 0.037601167 | up | yes |
|             |                                | 1.939729566 | 0.037688921 | up | yes |
|             |                                | 1.697006093 | 0.037806431 | up | yes |
|             |                                | 2.134333839 | 0.037825581 | up | yes |
|             |                                | 2.038297247 | 0.038682597 | up | yes |
|             |                                | 1.959417444 | 0.039350745 | up | yes |
|             |                                | 2.079120521 | 0.039356881 | up | yes |
| HMDB0000190 | L-Lactic acid                  | 1.603348544 | 0.039419229 | up | yes |
|             |                                | 1.681470072 | 0.039637663 | up | yes |
|             |                                | 1.859143987 | 0.039745298 | up | yes |
|             |                                | 1.662990829 | 0.039987092 | up | yes |
|             |                                | 1.964764321 | 0.0403896   | up | yes |
|             |                                | 2.102287169 | 0.041397108 | up | yes |
|             |                                | 2.114910349 | 0.041907669 | up | yes |
|             |                                | 2.120175882 | 0.042346021 | up | yes |
|             |                                | 1.517269004 | 0.042576278 | up | yes |
|             |                                | 1.911740257 | 0.042633001 | up | yes |
|             |                                | 2.216143856 | 0.043227612 | up | yes |
|             |                                | 1.84286065  | 0.043457279 | up | yes |
|             |                                | 1.753224234 | 0.043860743 | up | yes |
|             |                                | 2.068932433 | 0.043944742 | up | yes |
|             |                                | 2.062638142 | 0.044125733 | up | yes |
|             |                                | 2.10944788  | 0.044471319 | up | yes |
|             |                                | 1.740576334 | 0.044573028 | up | yes |
|             |                                | 2.102622705 | 0.044853569 | up | yes |
|             |                                | 1.56798123  | 0.045991903 | up | yes |
|             |                                | 1.891241189 | 0.046022318 | up | yes |
|             |                                | 1.619464937 | 0.046116562 | up | yes |
|             |                                | 1.791809574 | 0.046321111 | up | yes |
|             |                                | 1.622834782 | 0.046696293 | up | yes |
|             |                                | 1.739141768 | 0.046795362 | up | yes |
|             |                                | 2.032610761 | 0.046867402 | up | yes |
|             |                                | 2.097332426 | 0.047172227 | up | yes |
|             |                                | 1.564536972 | 0.047499963 | up | yes |
|             |                                | 1.728744819 | 0.047645031 | up | yes |

|             |             |    |     |
|-------------|-------------|----|-----|
| 2.091749623 | 0.047653954 | up | yes |
| 1.668813207 | 0.047837122 | up | yes |
| 1.406619022 | 0.048108991 | up | yes |
| 1.722783376 | 0.0481971   | up | yes |
| 1.61342549  | 0.048430399 | up | yes |
| 1.765466911 | 0.048641227 | up | yes |
| 1.505124775 | 0.048813888 | up | yes |
| 2.010127635 | 0.048853631 | up | yes |
| 1.503694132 | 0.049015523 | up | yes |
| 2.041542214 | 0.049156749 | up | yes |
| 1.870413918 | 0.049167061 | up | yes |
| 1.715239175 | 0.049522492 | up | yes |
| 1.792269175 | 0.04960253  | up | yes |

Notes: DEMs: Differentially Expressed Metabolites; VIP: variable importance in projection values.

### Supplementary table 8 The enriched pathways of DEMs

| Pathway2                                    | -lg2(p) | Impact  |
|---------------------------------------------|---------|---------|
| Glycerophospholipid metabolism              | 3.5319  | 0.0463  |
| Cyanoamino acid metabolism                  | 2.9208  | 0       |
| Arginine and proline metabolism             | 2.8274  | 0.03042 |
| Methane metabolism                          | 2.528   | 0       |
| Nitrogen metabolism                         | 2.528   | 0       |
| Purine metabolism                           | 2.0721  | 0.00581 |
| Pantothenate and CoA biosynthesis           | 2.0424  | 0       |
| beta-Alanine metabolism                     | 1.9256  | 0       |
| Fructose and mannose metabolism             | 1.731   | 0.03142 |
| Pyruvate metabolism                         | 1.6483  | 0       |
| Glycolysis or Gluconeogenesis               | 1.5382  | 0       |
| Galactose metabolism                        | 1.5382  | 0       |
| Glutathione metabolism                      | 1.5382  | 0.00573 |
| Porphyrin and chlorophyll metabolism        | 1.5046  | 0       |
| Glycine, serine and threonine metabolism    | 1.383   | 0.26884 |
| Amino sugar and nucleotide sugar metabolism | 1.2307  | 0.04649 |
| Valine, leucine and isoleucine degradation  | 1.2081  | 0       |
| Pyrimidine metabolism                       | 1.1444  | 0.04182 |
| Primary bile acid biosynthesis              | 1.0496  | 0.02976 |
| Aminoacyl-tRNA biosynthesis                 | 0.73628 | 0       |

Notes: DEMs: Differentially Expressed Metabolites.

### Supplementary table 9 KEGG pathways involving both DEGs and DEMs

| ID       | Description        | DEGs and DEMs                                                                                                                                                                                                                                                                  | Count |
|----------|--------------------|--------------------------------------------------------------------------------------------------------------------------------------------------------------------------------------------------------------------------------------------------------------------------------|-------|
| mmu01100 | Metabolic pathways | cpd: C00106 Uracil; cpd:C00794 D-Sorbitol; cpd:C00550 Sphingomyelin; cpd:C00350 Phosphatidylethanolamine; cpd:C00157 Phosphatidylcholine; cpd:C00357 N-Acetyl-D-glucosamine 6-phosphate; cpd:C02170 Methylmalonate; cpd:C00186 (S)-Lactate; cpd:C00037 Glycine; cpd:C01233 sn- | 19    |

---

|          |                                         |                                                                                                                                                                                                                                                                                                                                                                                                                        |   |
|----------|-----------------------------------------|------------------------------------------------------------------------------------------------------------------------------------------------------------------------------------------------------------------------------------------------------------------------------------------------------------------------------------------------------------------------------------------------------------------------|---|
|          |                                         | Glycero-3-phosphoethanolamine; cpd:C00763 D-Proline; cpd:C04308 Phosphatidyl-N-dimethylethanolamine; cpd:C00559 Deoxyadenosine; cpd:C00327 L-Citrulline cpd:C00212 Adenosine; mmu:17319 Mif: macrophage migration inhibitory factor (glycosylation-inhibiting factor); mmu:75406 Ndufs7: NADH:ubiquinone oxidoreductase core subunit S7; mmu:103149 Upb1: ureidopropionase, beta; mmu:12346 Car1: carbonic anhydrase 1 |   |
| mmu00564 | Glycerophospholipid metabolism          | cpd: C00350 Phosphatidylethanolamine; cpd:C00157 Phosphatidylcholine; cpd:C04230 1-Acyl-sn-glycero-3-phosphocholine; cpd:C01233 sn-Glycero-3-phosphoethanolamine; cpd:C00670 sn-Glycero-3-phosphocholine; cpd:C04308 Phosphatidyl-N-dimethylethanolamine; mmu:12647 Chat: choline acetyltransferase                                                                                                                    | 7 |
| mmu04080 | Neuroactive ligand-receptor interaction | cpd: C00037 Glycine; cpd:C00212 Adenosine; mmu:21333 Tac1: tachykinin 1; mmu:13490 Drd3: dopamine receptor D3; mmu:11552 Adra2b: adrenergic receptor, alpha 2b; mmu:13488 Drd1: dopamine receptor D1                                                                                                                                                                                                                   | 6 |
| mmu05231 | Choline metabolism in cancer            | cpd: C00157 Phosphatidylcholine; cpd:C04230 1-Acyl-sn-glycero-3-phosphocholine; cpd:C00670 sn-Glycero-3-phosphocholine; mmu:63993 Slc5a7: solute carrier family 5 (choline transporter), member 7                                                                                                                                                                                                                      | 4 |
| mmu00240 | Pyrimidine metabolism                   | cpd: C00106 Uracil; cpd:C02170 Methylmalonate; mmu:103149 Upb1: ureidopropionase, beta                                                                                                                                                                                                                                                                                                                                 | 3 |
| mmu04723 | Retrograde endocannabinoid signaling    | cpd: C00350 Phosphatidylethanolamine; cpd:C00157 Phosphatidylcholine;mmu:75406 Ndufs7: NADH:ubiquinone oxidoreductase core subunit S7                                                                                                                                                                                                                                                                                  | 3 |
| mmu04024 | cAMP signaling pathway                  | cpd: C00186 (S)-Lactate; cpd:C00212 Adenosine; mmu:13488 Drd1: dopamine receptor D1                                                                                                                                                                                                                                                                                                                                    | 3 |
| mmu05012 | Parkinson disease                       | cpd: C00212 Adenosine; mmu:75406 Ndufs7: NADH:ubiquinone oxidoreductase core subunit S7; mmu:13488 Drd1: dopamine receptor D1                                                                                                                                                                                                                                                                                          | 3 |
| mmu00770 | Pantothenate and CoA biosynthesis       | cpd: C00106 Uracil; mmu:103149 Upb1: ureidopropionase, beta                                                                                                                                                                                                                                                                                                                                                            | 2 |
| mmu00410 | beta-Alanine metabolism                 | cpd: C00106 Uracil; mmu:103149 Upb1: ureidopropionase, beta                                                                                                                                                                                                                                                                                                                                                            | 2 |
| mmu05415 | Diabetic cardiomyopathy                 | cpd: C00794 D-Sorbitol; mmu:75406 Ndufs7: NADH:ubiquinone oxidoreductase core subunit S7                                                                                                                                                                                                                                                                                                                               | 2 |
| mmu04022 | cGMP-PKG signaling pathway              | cpd: C00212 Adenosine; mmu:11552 Adra2b: adrenergic receptor, alpha 2b                                                                                                                                                                                                                                                                                                                                                 | 2 |
| mmu05034 | Alcoholism                              | cpd: C00212 Adenosine; mmu:13488 Drd1: dopamine receptor D1                                                                                                                                                                                                                                                                                                                                                            | 2 |
| mmu05032 | Morphine addiction                      | cpd: C00212 Adenosine; mmu:13488 Drd1: dopamine receptor                                                                                                                                                                                                                                                                                                                                                               | 2 |

---



Notes: DEMs: Differentially Expressed Metabolites; DEGs: Differentially Expressed Genes; KEGG: Kyoto Encyclopedia of Genes and Genomes.
